# Supplementary material for: Combinatory antibiotic therapy increases rate of bacterial kill but not final outcome in a novel mouse model of Staphylococcus aureus spinal implant infection
Source: PLoS One. 2017 Feb 28;12(2):e0173019. doi: 10.1371/journal.pone.0173019 (PMC5330510; doi:10.1371/journal.pone.0173019)
Supplement: S1 File — (XLSX) [file pone.0173019.s001.xlsx]

## Sheet: Biolum Total Flux
		Day 0	Day 1	Day 3	Day 5	Day 7	Day 10	Day 14	Day 17	Day 21	Day 25	Day 28	Day 32	Day 35	Day 42
	Control 1	130100	321500	2293000	3591000	7199000	5788000	1789000	330900	437100	148400	184000	164700	253100	323900
	Control 2	143900	149300	199700	611200	294400	1616000	839100	1140000	105600	402700	151100	124100	138700	126900
	Control 3	70060	161200	283700	187500	327700	384800	413400	161500	185200	148900	148500	156100	145300	124400
	Control 4	98480	165000	458200	469700	426400	693100	475100	624700	97500	122600	165500	119500	156300	121100
	Control 5	96390	519600	542600	370700	584100	278800	170900	452800	127400	119500	149700	123900	169300	108600
	A1	97550	654000	2079000	3031000	714800	2895000	3013000	245400	250400	104600	142300	142800	131700	323900
	A2	43080	239200	317400	218300	283500	395400	107300	118200	70830	110400	142300	124100	128200	126900
	A3	33580	1605000	1562000	1965000	1289000	6401000	1120000	438400	87510	151700	203500	156100	116900	124400
	A4	113600	186300	745300	1437000	1964000	815700	344500	603600	194100	110700	182180	119500	122900	121100
	A5	101200	192300	502700	708300	604000	614500	151900	105100	165400	91520	184100	123900	120700	108600
	A6	84600	822100	2838000	1532000	2932000	8956000	968600	588200	57230	89020	168960	142800	71370
	AVE	92049.1	455955	1.07469e+06	1.28379e+06	1.51081e+06	3.34627e+06	950883	437164	161661	145458	165649	136136	141315	160980
	SD	33362.6	443903	943571	1.16371e+06	2.0617e+06	3.03278e+06	879433	302650	108834	88108.1	20602.5	16865.7	44769.7	86122.1
	SEM	10059.2	133842	284497	350872	621627	914417	265159	91252.3	32814.8	26565.6	6211.89	5085.21	13498.6	27234.2
	Vanc 1	119700	227500	116900	1027000	1894000	306000	177500	139600	105500	127900	167900	125300	140900	129700
	Vanc 2	135600	279000	218600	464000	3340000	2107000	252200	133300	80720	86970	186940	178200	113000	137300
	Vanc 3	153400	137000	153000	147000	143400	159500	125900	74300	90720	107800	136200	183000	137100	212100
	Vanc 4	109600	227900	1596000	732900	1810000	1768000	148700	111500	111100	100900	192780	119600	295800	199000
	Vanc 5	194100	699500	3396000	1901000	3229000	1274000	189400	133000	164700	241100	343700	178800	171600	135300
	B1	37080	2641000	377800	855400	894400	2434000	395100	291800	115100	116600	178610	111300	197610	129700
	B2	123200	102100	230500	629700	338700	146400	96520	58900	75600	111400	180620	178200	180920	137300
	B3	47540	866500	5991000	7520000	5984000	2771000	995500	148500	196200	98540	186490	183000	115600	212100
	B4	71310	213500	1076000	1105000	216400	542600	259200	173800	92210	113200	111800	119600	100600	199000
	B5	95140	155200	457400	946400	398000	3921000	1416000	666000	36590	290400	103700	178800	144000	135300
	B6	70290	142600	1050000	2084000	1008000	518700	100500	95660	95330	76680	97640	111300	112000
	AVE	105178	517436	1.33302e+06	1.58295e+06	1.75054e+06	1.44984e+06	377865	184215	105797	133772	171489	151555	155375	162680
	SD	47050.7	746364	1.82143e+06	2.04983e+06	1.80837e+06	1.25487e+06	428617	171230	43137.9	67639.5	67511.3	32946.3	55992	37246.8
	SEM	14186.3	225037	549181	618047	545244	378359	129233	51627.7	13006.6	20394.1	20355.4	9933.67	16882.2	11778.5
	Combined 1	154500	222700	940700	3045000	3891000	247000	148300	117300	88160	97170	127100	146000	136100	168000
	Combined 2	110300	108700	158500	220500	146000	141500	132800	136200	139600	120500	231300	140200	264200	171500
	Combined 3	115600	176200	285000	280300	135200	104400	162500	108200	122800	69710	132900	153200	144400	143400
	Combined 4	138700	986500	1104000	1176000	1175000	148500	110600	88360	82270	132800	165500	113300	182100	152200
	Combined 5	111800	172700	1309000	903200	1270000	210400	176200	146000	125600	97700	149700	148100	164900	168700
	C1	103900	211400	1384000	822400	1238000	105700	137900	110300	70180	52940	89770	158300	104300	168000
	C2	82130	1418000	2497000	2236000	2165000	133200	158900	106200	80730	94280	81120	140200	199000	171500
	C3	78020	303100	1127000	1312000	1466000	264900	155500	104900	82350	72110	106400	153200	109500	143400
	C4	114900	340000	1018000	1590000	2176000	110500	104400	109700	73420	75230	113600	113300	112000	152200
	C5	34300	76150	107400	95280	182600	107000	91610	105200	108400	83630	92180	148100	108100	168700
	C6	106900	138300	133600	100400	119800	94920	122600	133500	89600	114400	119700	158300	87710
	AVE	104641	377614	914927	1.07101e+06	1.26951e+06	151638	136483	115078	96646.4	91860.9	128115	142927	146574	160760
	SD	31817.4	426000	721239	944721	1.16604e+06	60886.2	26794.2	16850.9	23519.1	24108.7	42729.2	15865.3	52534.6	11599.3
	SEM	9593.32	128444	217462	284844	351575	18357.9	8078.75	5080.72	7091.28	7269.04	12883.3	4783.57	15839.8	3668.04
	0
	1	0.250241	0.122243	0.0255606	0.129197	0.730781
	3	0.0137581	0.0136483	0.00213241	0.067058	0.0658417	0.0162513	0.342323
	5	0.00266913	0.0770437	0.197617	0.543733	0.0671601	0.086885	0.443095
	7
	10
	14
	17
	21
	25
	28
	32
	35
	42

## Sheet: CFU tissue
			CFU Tissue
	Control	A1	826
	Control	A2	22
	Control	A3	5
	Control	A4	438
	Control	A5	6
	Control	A6	275
		AVE	262
		SD	328.154
		SEM	133.968
	Vanc	B1	700
	Vanc	B2	14
	Vanc	B3	220
	Vanc	B4	700
	Vanc	B5	19
	Vanc	B6	6
		AVE	276.5
		SD	337.722
		SEM	137.874
	Combined	C1	4
	Combined	C2	579
	Combined	C3	0
	Combined	C4	579
	Combined	C5	526
	Combined	C6	6
		AVE	282.333
		SD	306.247
		SEM	125.025
